# Supplementary material
Source: MDPI journal article supplement (https://www.mdpi.com/1999-4907/12/9/1278)
Supplement: s1 [file s1]

**Supplementary material to the article "Carbon, nutrients and methylmercury in water from small catchments affected by various forest management operations".**

Authors: Zane Kļaviņa, Arta Bārdule, Karin Eklöf, Krišs Bitenieks, Ivars Kļaviņš and Zane Lībiete

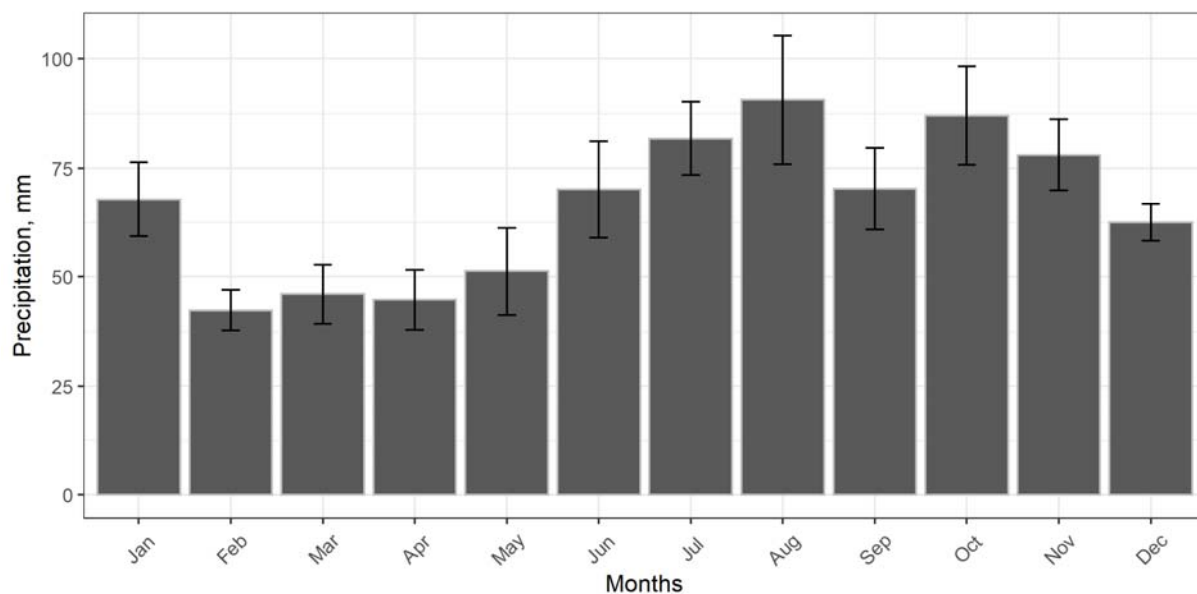

**Figure S1.** Monthly average precipitation pattern for the period 2007-2019 in the study area.
